# Supplementary material
Source: PubMed Central journal article supplement (PMC9097170)
Supplement: NIHMS1791022-supplement-1.pdf [file NIHMS1791022-supplement-1.pdf]

---

## **Supplemental Material**

### **Supplemental Material Figure Legends**

**Supplemental Material Figure 1:** Adherence To The Post-Procedure Anticoagulation And Antiplatelet Therapy Protocol From Pivotal Trials Among 31,944 Patients Who Underwent Watchman LAAO And Enrolled In The NCDR LAAO Registry Between January 1, 2016 And November 31, 2018.

Journal Pre-proof

---

**Supplemental Material Table 1. Adverse Events Collected in the LAAO Registry.**

---

**Adverse Events**

---

Myocardial Infarction

Endocarditis

Iatrogenic ASD (requiring intervention)

PCI

Pericardial Effusion (requiring drainage)

Pericardial Effusion with tamponade (requiring percutaneous drainage)

Pericardial Effusion without tamponade (requiring percutaneous drainage)

Pericardial Effusion (requiring open cardiac surgery)

Pericarditis

Unplanned Cardiac Surgery

Unplanned Intervention

LAA Occlusion Reintervention

Systemic Thromboembolism (other than stroke)

New requirement for Dialysis

---

---

Non-Device Related Readmission

Device Related Readmission

Device Related Readmission

Device Fracture

Device Migration

Device Systemic Embolism

Device Thrombus

Hemorrhagic Stroke

Ischemic Stroke

Undetermined Stroke

TIA

Intracranial Hemorrhage (other than hemorrhagic stroke)

Bleeding Event

Other Vascular Complications

Access site Bleeding

Hematoma

---

---

GI Bleeding

Retroperitoneal Bleeding

Other Hemorrhage (non-intracranial)

Major Bleeding

Major Vascular Complication

Device Explant

AV Fistula (requiring surgical repair)

Pseudoaneurysm (requiring endovascular repair)

Pseudoaneurysm (requiring surgical repair)

Pseudoaneurysm (requiring thrombin injection only)

Hemothorax (requiring drainage)

---

**Supplemental Material Table 2. Definitions of Major Adverse Events in the LAAO Registry.**

| <b>Adverse Event</b>   | <b>Definition</b>                                                                                                                                                                                                                                                                                                                                                                                                 |
|------------------------|-------------------------------------------------------------------------------------------------------------------------------------------------------------------------------------------------------------------------------------------------------------------------------------------------------------------------------------------------------------------------------------------------------------------|
| <b>Cardiac Arrest</b>  | Cardiac arrest is the cessation of cardiac activity. The patient becomes unresponsive with no normal breathing and no signs of circulation. If corrective measures are not taken rapidly, this condition progresses to sudden death. Cardiac arrest should be used to signify an event as described above that is reversed, usually by CPR and/or defibrillation or cardioversion or cardiac pacing. <sup>1</sup> |
| <b>Ischemic Stroke</b> | An ischemic stroke is an acute episode of focal or global neurological dysfunction caused by brain, spinal cord, or retinal vascular injury as a result of infarction of central nervous system tissue. <sup>2</sup>                                                                                                                                                                                              |

|                                      |                                                                                                                                                                                                                                                                                                                               |
|--------------------------------------|-------------------------------------------------------------------------------------------------------------------------------------------------------------------------------------------------------------------------------------------------------------------------------------------------------------------------------|
| <b>Hemorrhagic Stroke</b>            | <p>An acute episode of focal or global cerebral or spinal dysfunction caused by intraparenchymal, intraventricular, or subarachnoid hemorrhage.</p> <p>Note: Subdural hematomas are intracranial hemorrhagic events and not strokes.<sup>2</sup></p>                                                                          |
| <b>Undetermined Stroke</b>           | <p>A stroke of undetermined origin is defined as an acute episode of focal or global neurological dysfunction caused by presumed brain, spinal cord, or retinal vascular injury as a result of hemorrhage or infarction but with insufficient information to allow categorization as ischemic or hemorrhagic.<sup>2</sup></p> |
| <b>Transient Ischemia<br/>Attack</b> | <p>A transient ischemic attack (TIA) is a transient episode of neurological dysfunction caused by focal brain, spinal cord, or retinal ischemia, without acute infarction.<sup>2</sup></p>                                                                                                                                    |
| <b>Intracranial<br/>Hemorrhage</b>   | <p>Rapidly developing signs of neurologic dysfunction and/or headache due to bleeding into the subarachnoid space (the space</p>                                                                                                                                                                                              |

|                      |                                                                                                                                                                                                                                                                                                                                                                                                                                                                                                         |
|----------------------|---------------------------------------------------------------------------------------------------------------------------------------------------------------------------------------------------------------------------------------------------------------------------------------------------------------------------------------------------------------------------------------------------------------------------------------------------------------------------------------------------------|
|                      | between the arachnoid membrane and the pia mater of the brain and spinal cord).                                                                                                                                                                                                                                                                                                                                                                                                                         |
| <b>Intracerebral</b> | Intracerebral hemorrhage (ICH) bleeding is usually derived from arterioles. The bleeding is directly into the brain, forming a localized hematoma that spreads along white matter pathways. Accumulation of blood occurs over minutes or hours and the neurologic symptoms usually increase gradually over minutes or a few hours.                                                                                                                                                                      |
| <b>Subarachnoid</b>  | Subarachnoid hemorrhage (SAH) occurs with the rupture of an aneurysm releasing blood directly into the cerebrospinal fluid (CSF) under arterial pressure. The blood spreads quickly within the CSF, rapidly increasing intracranial pressure. Death or deep coma ensues if the bleeding continues. The bleeding usually lasts only a few seconds, but re-bleeding is common. With causes of SAH other than aneurysm rupture, the bleeding is less abrupt and may continue over a longer period of time. |

|                                    |                                                                                                                                                                                                                                                                                                                |
|------------------------------------|----------------------------------------------------------------------------------------------------------------------------------------------------------------------------------------------------------------------------------------------------------------------------------------------------------------|
| <b>Subdural</b>                    | Subdural hematomas form between the dura and the arachnoid membranes and often require surgical treatment to prevent irreversible brain injury and death caused by hematoma expansion, elevated intracranial pressure, and brain herniation.                                                                   |
| <b>Systemic Arterial Embolism</b>  | Systemic thromboembolism occurs when a blood vessel (venous or arterial) has been obstructed by a blood clot that was dislodged from another site within the circulatory system.                                                                                                                               |
| <b>Major Bleeding</b>              | Any bleeding requiring hospitalization, and/or causing a decrease in hemoglobin level $> 2\text{g/dL}$ , and/or requiring blood transfusion that was not hemorrhagic stroke.                                                                                                                                   |
| <b>Major Vascular Complication</b> | Vascular complications can include, but are not limited to, access site occlusions, peripheral embolizations, dissections, pseudoaneurysms and/or AV fistulas. Any noted vascular complication must have had an intervention such as a fibrin injection, angioplasty, or surgical repair to qualify. Prolonged |



pressure does not qualify as an intervention, but ultrasonic guided compression after making a diagnosis of pseudoaneurysm does qualify. A retroperitoneal bleed or hematoma requiring transfusion is not a vascular complication under this data element. To qualify, this adverse outcome should be attributable to this procedure and not related to a previous or subsequent procedure.

**Myocardial Infarction**

The term acute myocardial infarction (MI) should be used when there is evidence of myocardial necrosis in a clinical setting consistent with acute myocardial ischemia. Under these conditions any one of the following criteria meets the diagnosis for MI:

- Detection of a rise and/or fall of cardiac biomarker values [preferably cardiac troponin (cTn) with at least one value above the 99th percentile upper reference limit (URL) and with at least one of the following: o Symptoms of ischemia. o New or presumed new significant ST-segment-T wave (ST-T) changes or

new left bundle branch block (LBBB). o Development of pathological Q waves in the ECG. o Imaging evidence of new loss of viable myocardium or new regional wall motion abnormality. o Identification of an intracoronary thrombus by angiography or autopsy.

- Cardiac death with symptoms suggestive of myocardial ischemia and presumed new ischemic ECG changes or new LBBB, but death occurred before cardiac biomarkers were obtained, or before cardiac biomarker values would be increased.
- Percutaneous coronary intervention (PCI) related MI is arbitrarily defined by elevation of cTn values ( $>5 \times$  99th percentile URL) in patients with normal baseline values (99th percentile URL) or a rise of cTn values  $>20\%$  if the baseline values are elevated and are stable or falling. In addition, either (i) symptoms suggestive of myocardial ischemia or (ii) new ischemic ECG changes or (iii) angiographic findings consistent

with a procedural complication or (iv) imaging demonstration of new loss of viable myocardium or new regional wall motion abnormality are required.

- Stent thrombosis associated with MI when detected by coronary angiography or autopsy in the setting of myocardial ischemia and with a rise and/or fall of cardiac biomarker values with at least one value above the 99th percentile URL.
- Coronary artery bypass grafting (CABG) related MI is arbitrarily defined by elevation of cardiac biomarker values ( $>10$  x 99th percentile URL) in patients with normal baseline cTn values (99th percentile URL). In addition, either (i) new pathological Q waves or new LBBB, or (ii) angiographic documented new graft or new native coronary artery occlusion, or (iii) imaging evidence of new loss of viable myocardium or new regional wall motion abnormality.<sup>3</sup>

|                                                    |                                                                                                                                                                                                                                                                                                                                                                                                                                                                                                                                                                 |
|----------------------------------------------------|-----------------------------------------------------------------------------------------------------------------------------------------------------------------------------------------------------------------------------------------------------------------------------------------------------------------------------------------------------------------------------------------------------------------------------------------------------------------------------------------------------------------------------------------------------------------|
| <b>Pericardial Effusion Requiring Intervention</b> | <p>Pericardial fluid in the pericardial space compromising cardiac filling and requiring percutaneous drainage. If tamponade occurs there would be fluid in the pericardial space compromising cardiac filling, and requiring intervention such as pericardiocentesis. This should be documented by either:</p> <ol style="list-style-type: none"><li>1. Echo showing pericardial fluid and signs of tamponade such as right heart compromise, or</li><li>2. Systemic hypotension due to pericardial fluid compromising cardiac function.<sup>4</sup></li></ol> |
| <b>Device Embolization</b>                         | <p>The device became displaced from its initial annular implantation site. The device is no longer in its original position and has navigated to or past the aortic root and/or ascending/descending aorta.</p>                                                                                                                                                                                                                                                                                                                                                 |

---

**Supplemental Material Table 3. Candidate Variables Included in Adjusted Logistic Regression Models.**

---

Age, female, race, CHA<sub>2</sub>DS<sub>2</sub>-VASC score components (congestive heart failure/ left ventricular dysfunction, hypertension, diabetes mellitus, stroke, transient ischemic attack, thromboembolic event, vascular disease), HAS BLED score components (uncontrolled hypertension, abnormal renal function, abnormal liver function, prior bleeding, labile international normalized ratio (INR), alcohol use, antiplatelet drug, nonsteroidal anti-inflammatory drug, increased risk of falls), valvular atrial fibrillation, prior atrial flutter, cardiomyopathy, chronic lung disease, sleep apnea, prior cardiac structural intervention, coronary artery disease, height, weight, blood pressure, hemoglobin, prothrombin time/INR, serum creatinine, platelet count, baseline medications (warfarin, DOAC, P2Y12 inhibitor, DAPT, bridging anticoagulant therapy, transesophageal echocardiogram (TEE) performed, indication for LAAO (increased thromboembolic stroke risk, history of major bleed, high fall risk, labile INR, patient preference, non-compliance with anticoagulation therapy, procedure canceled, device margin residual leak.

---

**Supplemental Material Table 4. Baseline Characteristics 31,994 LAAO Registry Patients Between 2016 and 2018.**

| <b>Characteristic</b> | <b>Total</b> |            |
|-----------------------|--------------|------------|
|                       | <b>N</b>     | <b>(%)</b> |
| <b>Overall</b>        | 31,944       | (100)      |
| <b>Demographics</b>   |              |            |
| Age, mean (SD), years | 75.95        | (8.08)     |
| Age categories        |              |            |
| <55                   | 426          | (1.33)     |
| 55 to 64              | 1977         | (6.18)     |
| 65 to 74              | 10319        | (32.25)    |
| 75 to 84              | 14853        | (46.42)    |
| >=85                  | 4419         | (13.81)    |
| Sex                   |              |            |
| Male                  | 18828        | (58.85)    |
| Female                | 13153        | (41.11)    |
| Race                  |              |            |

---

|                                                             |               |
|-------------------------------------------------------------|---------------|
| White                                                       | 29616 (92.57) |
| Black                                                       | 1502 (4.69)   |
| Hispanic                                                    | 114 (0.36)    |
| Asian                                                       | 523 (1.63)    |
| American Indian/ Alaskan Native                             | 83 (0.26)     |
| Native Hawaiian/ Pacific Islander                           | 43 (0.13)     |
| Other                                                       | 113 (0.35)    |
| Primary insurance payer                                     |               |
| Medicare/Medicaid                                           | 27813 (86.93) |
| Private health insurance                                    | 3726 (11.65)  |
| Other                                                       | 455 (1.42)    |
| <b>CHA<sub>2</sub>DS<sub>2</sub>- VASC score, mean (SD)</b> | 4.55 (1.46)   |
| Congestive heart failure                                    | 11834 (36.99) |
| Congestive heart failure class                              |               |
| NYHA class I                                                | 2863 (8.95)   |
| NYHA class II                                               | 5439 (17.00)  |

---

---

|                                  |       |         |
|----------------------------------|-------|---------|
| NYHA class III                   | 2542  | (7.95)  |
| NYHA class IV                    | 165   | (0.52)  |
| Hypertension                     | 29521 | (92.27) |
| Diabetes mellitus                | 12138 | (37.94) |
| Prior transient ischemic attack  | 4625  | (14.46) |
| Prior thromboembolic event       | 5861  | (18.32) |
| Vascular disease                 | 13728 | (42.91) |
| Prior myocardial infarction      | 6533  | (20.42) |
| Peripheral arterial disease      | 4604  | (14.39) |
| Known aortic plaque              | 1363  | (4.26)  |
| <b>HAS-BLED score, mean (SD)</b> | 3.01  | (1.13)  |
| Uncontrolled hypertension        | 8407  | (26.28) |
| Abnormal renal function          | 4358  | (13.62) |
| Abnormal liver function          | 1012  | (3.16)  |
| Prior stroke                     | 8694  | (27.17) |
| Ischemic                         | 4817  | (15.06) |

---



---

|                                       |               |
|---------------------------------------|---------------|
| Hemorrhagic                           | 2346 (7.33)   |
| Undetermined                          | 1970 (6.16)   |
| Prior bleeding                        | 22451 (70.17) |
| Labile INR                            | 3805 (11.89)  |
| Alcohol use                           | 1787 (5.59)   |
| Antiplatelet medication use           | 8927 (27.90)  |
| Non-steroidal inflammatory drug use   | 9606 (30.02)  |
| <b>Other history and risk factors</b> |               |
| Clinically relevant prior bleeding    | 22278 (69.63) |
| Intracranial                          | 3806 (11.90)  |
| Epistaxis                             | 2059 (6.44)   |
| Gastrointestinal                      | 13407 (41.90) |
| Other                                 | 4820 (15.07)  |
| Fall risk                             | 12571 (39.29) |
| Genetic coagulopathy                  | 258 (0.81)    |
| Cardiomyopathy                        | 6741 (21.07)  |

---

---

|                                    |               |
|------------------------------------|---------------|
| Ischemic                           | 3447 (10.77)  |
| Non-ischemic                       | 2344 (7.33)   |
| Chronic lung disease               | 6757 (21.12)  |
| Coronary artery disease            | 15225 (47.59) |
| Sleep apnea                        | 8242 (25.76)  |
| <b>Arrhythmia history</b>          |               |
| Atrial fibrillation type           |               |
| Paroxysmal                         | 16665 (52.09) |
| Persistent (>7 days)               | 6794 (21.24)  |
| Long-standing persistent (>1 year) | 3111 (9.72)   |
| Permanent                          | 5304 (16.58)  |
| Atrial flutter                     | 4427 (13.84)  |

---

**Supplemental Material Table 5. Odds of Adverse Events from Discharge Through 45 +/- 14 Mutually Exclusive Discharge Medication Groupings.**

|                                       | Unadjusted   |                    |                  | Adjusted     |                    |                  |
|---------------------------------------|--------------|--------------------|------------------|--------------|--------------------|------------------|
|                                       | OR           | 95% CI             | P value          | OR           | 95% CI             | P value          |
| <b><u>Any adverse event</u></b>       |              |                    |                  |              |                    |                  |
| Warfarin and Aspirin                  | reference    |                    |                  |              |                    |                  |
| <b>Warfarin</b>                       | <b>0.716</b> | <b>0.596-0.860</b> | <b>&lt;0.001</b> | <b>0.637</b> | <b>0.525-0.774</b> | <b>&lt;0.001</b> |
| DOAC and Aspirin                      | 0.936        | 0.809-1.084        | 0.377            | 1.130        | 0.936-1.364        | 0.202            |
| <b>DOAC</b>                           | <b>0.702</b> | <b>0.575-0.857</b> | <b>0.001</b>     | <b>0.734</b> | <b>0.579-0.931</b> | <b>0.011</b>     |
| DAPT (P2Y12 and Aspirin)              | 1.045        | 0.810-1.347        | 0.736            | 0.892        | 0.674-1.181        | 0.425            |
| <b><u>Any major adverse event</u></b> |              |                    |                  |              |                    |                  |
| Warfarin and Aspirin                  | reference    |                    |                  |              |                    |                  |
| <b>Warfarin</b>                       | <b>0.763</b> | <b>0.624-0.933</b> | <b>0.008</b>     | <b>0.656</b> | <b>0.530-0.812</b> | <b>&lt;0.001</b> |
| DOAC and Aspirin                      | 0.980        | 0.835-1.149        | 0.802            | 1.212        | 0.986-1.491        | 0.068            |
| <b>DOAC</b>                           | <b>0.736</b> | <b>0.592-0.914</b> | <b>0.006</b>     | <b>0.766</b> | <b>0.591-0.993</b> | <b>0.044</b>     |
| DAPT (P2Y12 and Aspirin)              | 1.027        | 0.774-1.363        | 0.853            | 0.846        | 0.618-1.158        | 0.296            |

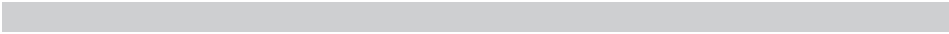

---

**Any readmissions**

|                          |           |             |       |       |             |       |
|--------------------------|-----------|-------------|-------|-------|-------------|-------|
| Warfarin and Aspirin     | reference |             |       |       |             |       |
| Warfarin                 | 1.032     | 0.879-1.224 | 0.719 | 1.013 | 0.844-1.215 | 0.891 |
| DOAC and Aspirin         | 1.039     | 0.895-1.206 | 0.614 | 1.112 | 0.913-1.355 | 0.293 |
| DOAC                     | 1.001     | 0.827-1.211 | 0.993 | 1.077 | 0.851-1.362 | 0.539 |
| DAPT (P2Y12 and Aspirin) | 1.070     | 0.820-1.395 | 0.619 | 0.885 | 0.660-1.188 | 0.416 |

**Any stroke or TIA**

|                          |           |             |       |       |             |       |
|--------------------------|-----------|-------------|-------|-------|-------------|-------|
| Warfarin and Aspirin     | reference |             |       |       |             |       |
| Warfarin                 | 1.048     | 0.616-1.782 | 0.863 | 1.013 | 0.844-1.215 | 0.891 |
| DOAC and Aspirin         | 1.429     | 0.941-2.168 | 0.094 | 1.112 | 0.913-1.355 | 0.293 |
| DOAC                     | 1.030     | 0.590-1.796 | 0.918 | 1.077 | 0.851-1.362 | 0.539 |
| DAPT (P2Y12 and Aspirin) | 1.378     | 0.672-2.827 | 0.381 | 0.885 | 0.660-1.188 | 0.416 |

**Device-related thrombus****(among those with TEE)**

|                      |           |             |       |       |             |       |
|----------------------|-----------|-------------|-------|-------|-------------|-------|
| Warfarin and Aspirin | reference |             |       |       |             |       |
| Warfarin             | 0.797     | 0.582-1.090 | 0.156 | 0.806 | 0.580-1.120 | 0.200 |

---

|                                        |           |             |       |       |             |       |
|----------------------------------------|-----------|-------------|-------|-------|-------------|-------|
| DOAC and Aspirin                       | 0.943     | 0.728-1.220 | 0.654 | 1.021 | 0.738-1.412 | 0.902 |
| DOAC                                   | 1.019     | 0.747-1.389 | 0.906 | 1.113 | 0.764-1.621 | 0.578 |
| DAPT (P2Y12 and Aspirin)               | 1.801     | 1.236-2.262 | 0.002 | 1.424 | 0.929-2.183 | 0.104 |
| <b><u>Peri-device leak &gt;5mm</u></b> |           |             |       |       |             |       |
| <b><u>(among those with TEE)</u></b>   |           |             |       |       |             |       |
| Warfarin and Aspirin                   | Reference |             |       |       |             |       |
| Warfarin                               | 0.675     | 0.412-1.107 | 0.120 | 0.659 | 0.392-1.106 | 0.114 |
| DOAC and Aspirin                       | 0.721     | 0.479-1.086 | 0.117 | 0.775 | 0.461-1.305 | 0.338 |
| DOAC                                   | 0.893     | 0.563-1.415 | 0.630 | 0.963 | 0.539-1.719 | 0.898 |
| DAPT (P2Y12 and Aspirin)               | 0.532     | 0.213-1.331 | 0.178 | 0.697 | 0.284-1.711 | 0.431 |

OR=odds ratio

95% CI=95% confidence

**Supplemental Material Table 6. Odds of Adverse Events from Discharge Through 6 Months In Mutually Exclusive Discharge Medication Groupings.**

| Adverse event                         | Unadjusted   |                    |              | Adjusted     |                    |              |
|---------------------------------------|--------------|--------------------|--------------|--------------|--------------------|--------------|
|                                       | OR           | 95% CI             | P value      | OR           | 95% CI             | P value      |
| <b><u>Any adverse event</u></b>       |              |                    |              |              |                    |              |
| Warfarin and Aspirin                  | reference    |                    |              |              |                    |              |
| <b>Warfarin</b>                       | <b>0.864</b> | <b>0.758-0.986</b> | <b>0.030</b> | <b>0.804</b> | <b>0.699-0.925</b> | <b>0.002</b> |
| DOAC and Aspirin                      | 0.884        | 0.789-0.991        | 0.034        | 1.095        | 0.945-1.269        | 0.227        |
| DOAC                                  | 0.844        | 0.731-0.974        | 0.020        | 0.949        | 0.797-1.131        | 0.562        |
| DAPT (P2Y12 and Aspirin)              | 0.965        | 0.790-1.178        | 0.724        | 0.823        | 0.660-1.026        | 0.083        |
| <b><u>Any major adverse event</u></b> |              |                    |              |              |                    |              |
| Warfarin and Aspirin                  | reference    |                    |              |              |                    |              |
| <b>Warfarin</b>                       | <b>0.917</b> | <b>0.804-1.046</b> | <b>0.195</b> | <b>0.847</b> | <b>0.735-0.976</b> | <b>0.022</b> |
| DOAC and Aspirin                      | 0.913        | 0.815-1.024        | 0.120        | 1.105        | 0.952-1.283        | 0.189        |
| DOAC                                  | 0.839        | 0.726-0.970        | 0.018        | 0.920        | 0.769-1.100        | 0.358        |
| DAPT (P2Y12 and Aspirin)              | 1.033        | 0.848-1.260        | 0.744        | 0.835        | 0.669-1.042        | 0.110        |



---

**Any readmission**

|                                 |              |                    |              |              |                    |              |
|---------------------------------|--------------|--------------------|--------------|--------------|--------------------|--------------|
| Warfarin and Aspirin            | reference    |                    |              |              |                    |              |
| Warfarin                        | 0.992        | 0.882-1.115        | 0.888        | 0.975        | 0.860-1.105        | 0.692        |
| DOAC and Aspirin                | 1.023        | 0.923-1.133        | 0.667        | 1.052        | 0.916-1.207        | 0.474        |
| DOAC                            | 1.093        | 0.962-1.241        | 0.172        | 1.124        | 0.957-1.320        | 0.153        |
| <b>DAPT (P2Y12 and Aspirin)</b> | <b>0.995</b> | <b>0.831-1.192</b> | <b>0.956</b> | <b>0.806</b> | <b>0.658-0.986</b> | <b>0.036</b> |

**Any stroke or TIA**

|                          |           |             |       |       |             |       |
|--------------------------|-----------|-------------|-------|-------|-------------|-------|
| Warfarin and Aspirin     | reference |             |       |       |             |       |
| Warfarin                 | 1.003     | 0.729-1.379 | 0.986 | 1.019 | 0.727-1.428 | 0.912 |
| DOAC and Aspirin         | 1.228     | 0.948-1.591 | 0.120 | 1.118 | 0.804-1.557 | 0.507 |
| DOAC                     | 1.144     | 0.832-1.573 | 0.408 | 0.990 | 0.669-1.465 | 0.961 |
| DAPT (P2Y12 and Aspirin) | 1.154     | 0.730-1.826 | 0.540 | 0.897 | 0.540-1.490 | 0.675 |

---

OR=odds ratio

95% CI=95% confidence intervals

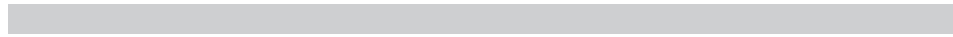

Journal Pre-proof



**Supplemental Material Figure 1. Adherence to the Post-Procedure Anticoagulation And Antiplatelet Therapy Protocol From Pivotal Trials Among 31,944 Patients Who Underwent Watchman LAAO and Enrolled in the NCDR LAAO Registry Between January 1, 2016 and November 31, 2018.**

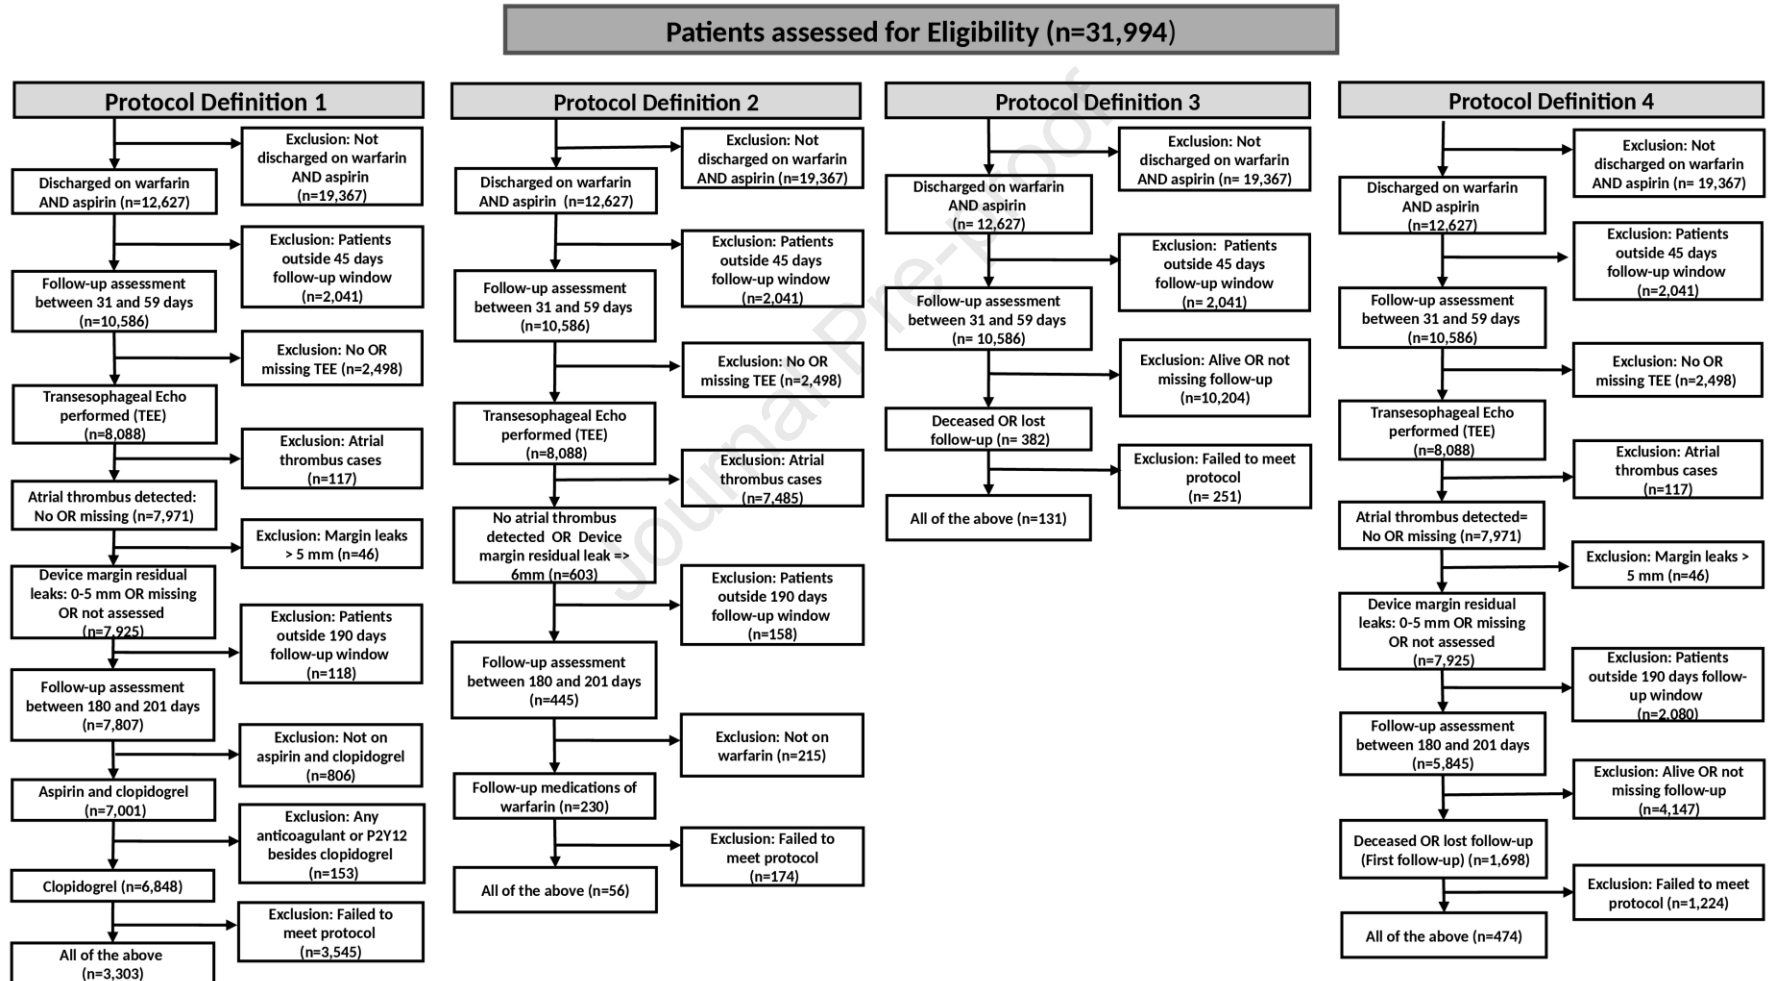

## References

1. Cannon CP, Brindis RG, Chaitman BR, et al. 2013 ACCF/AHA key data elements and definitions for measuring the clinical management and outcomes of patients with acute coronary syndromes and coronary artery disease: a report of the American College of Cardiology Foundation/American Heart Association Task Force on Clinical Data Standards (Writing Committee to Develop Acute Coronary Syndromes and Coronary Artery Disease Clinical Data Standards). *Crit Pathw Cardiol.* 2013;12(2):65-105.
2. Hicks KA, Tcheng JE, Bozkurt B, et al. 2014 ACC/AHA Key Data Elements and Definitions for Cardiovascular Endpoint Events in Clinical Trials: A Report of the American College of Cardiology/American Heart Association Task Force on Clinical Data Standards (Writing Committee to Develop Cardiovascular Endpoints Data Standards). *J Am Coll Cardiol.* 2015;66(4):403-469.
3. Thygesen K, Alpert JS, Jaffe AS, et al. Third universal definition of myocardial infarction. *J Am Coll Cardiol.* 2012;60(16):1581-1598.
4. McNamara RL, Brass LM, Drozda JP, Jr., et al. ACC/AHA key data elements and definitions for measuring the clinical management and outcomes of patients with atrial fibrillation: A report of the American College of Cardiology/American Heart Association Task Force on Clinical Data Standards (Writing Committee to Develop Data Standards on Atrial Fibrillation). *J Am Coll Cardiol.* 2004;44(2):475-495.
